# Supplementary material
Source: publisher figshare collection journal article supplement (https://gsapubs.figshare.com/ndownloader/files/39553162)

Myrow, P.M., et al., 2023, Structural control of Cambrian paleotopography and patterns of transgression in western Laurentia: *Geology*, <https://doi.org/10.1130/G51055.1>

## Supplemental Material

**Figure S1.** (A) Stratigraphic succession in Jones Hole, Utah, near the junction of Jones Hole Creek and the Green River. (B) Close-up of A. (C) Stratigraphic succession in Cross Mountain, Colorado, on north side of Yampa River.

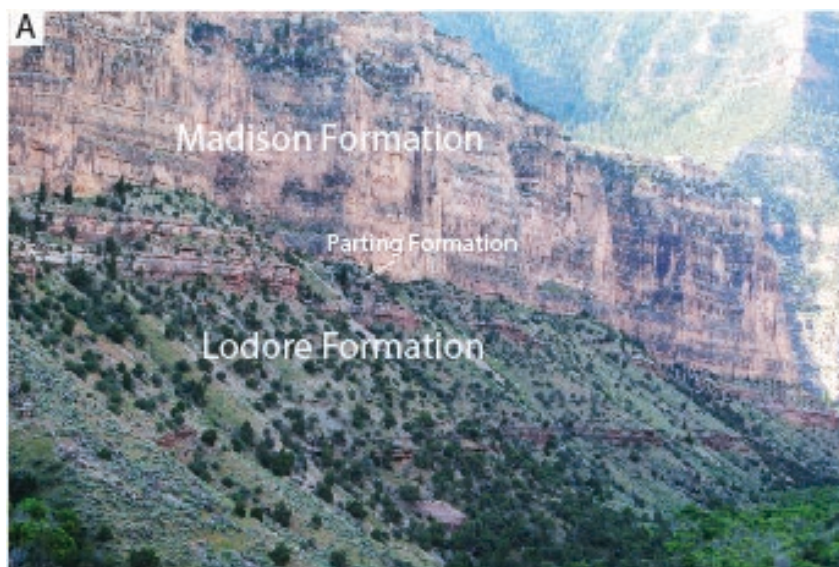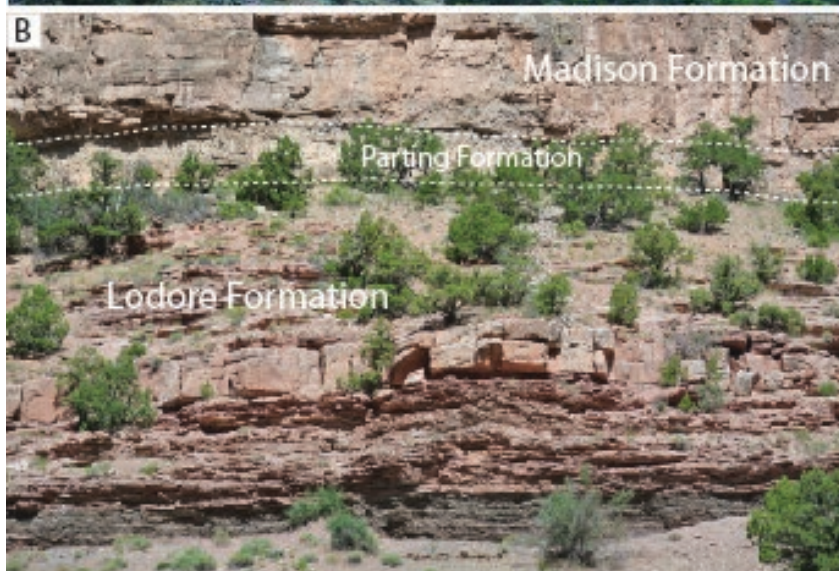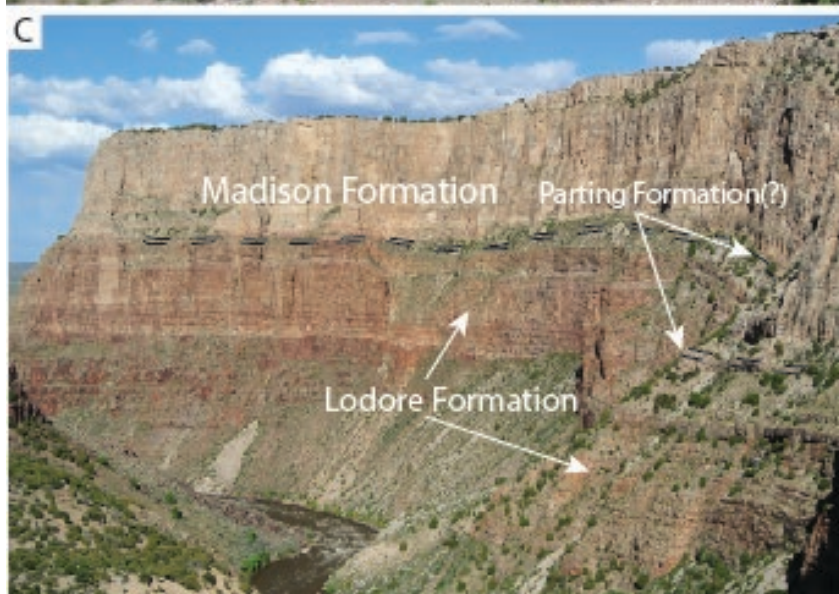

Supplement: Supplementary file 1 [file 39553162]
